# Supplementary material
Source: ML conference proceedings conference paper supplement (https://openaccess.thecvf.com/content/ICCV2021/html/Shedligeri_SeLFVi_Self-Supervised_Light-Field_ICCV_2021_paper.html)
Supplement: Supplementary file 1 [file Shedligeri_SeLFVi_Self-Supervised_Light-Field_ICCV_2021_supplemental.zip]

Archive with 2 entries (2 files):
- 09922-supp.mp4
- 09922-supp.pdf
